# Supplementary material for: Interventions to improve access to cancer care in underserved populations in high income countries: a systematic review
Source: PubMed Central journal article supplement (PMC11573526; doi:10.3389/or.2024.1427441), 2024-11-05
Supplement: Datasheet1.pdf [file Datasheet1.pdf]

## Interventions to improve access to cancer care in underserved populations in high income countries: A systematic review

### Appendix 1 - Search strategies for each database

Ovid MEDLINE(R) ALL <1946 to May 09, 2023>

Date of search: May 10, 2023

- 1 Rural Population/ 69005
- 2 (((rural\* or remote\*) adj3 (living or live? or communit\* or population\* or reside\* or town\* or village\* or setting\* or area\*)) or "small town\*" or countryside or "country side").mp. 148091
- 3 disabled persons/ or persons with hearing impairments/ or visually impaired persons/ 52945
- 4 ((learning or intellectual\* or physical\* or mobility or developmental\* or multiple) adj2 (disabl\* or disabilit\*).mp. 104398
- 5 ("hearing impair\*" or deaf\* or "hard of hearing" or "hearing los\*").mp. 120436
- 6 brain damage, chronic/ or brain injury, chronic/ or cerebral palsy/ 37287
- 7 cerebral palsy.mp. 31764
- 8 ("brain damage\*" or "brain\* injur\*").mp. 138461
- 9 exp Autism Spectrum Disorder/ 41741
- 10 (autism or autistic\* or Asperger\*).mp. 69375
- 11 exp hearing loss/ or blindness/ or exp deaf-blind disorders/ 97983
- 12 (blind\* or "visual\* impair\*" or "vision los\*").mp. 439407
- 13 self-help devices/ or communication aids for disabled/ or exp wheelchairs/13168
- 14 canes/ or crutches/ or walkers/ 1760
- 15 Hearing Aids/ 9898
- 16 Cochlear Implants/ 12517
- 17 (wheelchair\* or crutch\* or cane? or walker\* or "mobility aid\*" or "hearing aid\*" or "cochlear implant\*" or "vision aid\*").mp. 65830
- 18 (dyslexi\* or dysgraphi\* or dyspraxi\* or dyscalculi\*).mp. 12487
- 19 (((people\* or person\* or individual\* or m?n or wom?n or population\*) adj3 (disabl\* or disabilit\*)) or handicapped).mp. 75380
- 20 Vulnerable Populations/ 12763
- 21 low socioeconomic status/ 27
- 22 ((disadvantage\* or vulnerab\* or raciali\* or poor\* or "low\* income\*" or socioeconomic\* or socio-economic\* or discriminat\* or marginali\* or underserved or underrepresented) adj3 (population\* or group\* or communit\* or people\* or person\* or m?n or wom?n or male\* or female\* or adult\* or subpopulation or sub-population\* or patient\*).mp. 245709
- 23 asian/ or "black or african american"/68279
- 24 exp "Hispanic or Latino"/ 37956
- 25 exp "emigrants and immigrants"/ or refugees/ 27615
- 26 Ethnic and Racial Minorities/ 503

- 27 (black? or african\* or afro\* or latin? or non-white or immigrant\* or emigrant\* or refugee\* or "asylum seek\*" or asian or non-caucasian or "racial minorit\*" or "ethnic minorit\*").mp. 638562
- 28 exp "Sexual and Gender Minorities"/ 15838
- 29 bisexuality/ or exp homosexuality/ or transsexualism/ 39315
- 30 (LGB\* or homosexual\* or gay? or lesbian\* or bisexual\* or transgender\* or transsexual\* or queer\* or "men who have sex with men" or MSM or "women who have sex with women" or WSW or "gender minorit\*" or "sex\* minorit\*").mp. 70576
- 31 Social Determinants of Health/ 6314
- 32 Social determinants of health.mp. 14332
- 33 or/1-322004689
- 34 exp neoplasms/dt, th, rt, su or exp neoplasms by histologic type/dt, th, rt, su or exp neoplasms by site/dt, th, rt, su 1630616
- 35 (exp neoplasms/ or exp neoplasms by histologic type/ or exp neoplasms by site/) and (treatment\* or care or caring or management or therap\* or medicine\* or drug\* or surger\* or surgical).ab. 1589138
- 36 ((Cancer\* or Neoplasm\* or malignan\* or tumor\* or tumour\*) adj7 (treat\* or care or caring or management or therap\* or medicine\* or drug\* or surger\* or surgical)).mp. 1281036
- 37 exp Antineoplastic Agents/ 1239650
- 38 exp radiotherapy/ or exp chemoradiotherapy/ 206540
- 39 (chemotherap\* or radiotherap\* or chemoradiotherap\*).mp. 866915
- 40 oncological.mp. 33951
- 41 ((leukemia or sarcoma\* or lymphoma\* or myeloma\* or melanoma\* or carcinoma\*) adj7 (treat\* or care or caring or management or therap\* or medicine\* or drug\* or surger\* or surgical)).mp. 308643
- 42 or/34-41 3417474
- 43 Health Services Accessibility/85195
- 44 ((health or healthcare or medicine\* or therap\* or treatment\* or program\* or service\*) adj4 (access\* or availab\* or convenien\* or delay\* or equal\* or equit\* or unequal\* or inequal\* or barrier\* or obstacle\*)).mp. 384930
- 45 access to care\*.mp. 17416
- 46 universal access\*.mp.2542
- 47 or/43-46 393076
- 48 exp Canada/ 180818
- 49 (Canad\* or "british columbia\*" or alberta\* or saskatchewan or manitoba\* or ontario or ontarian\* or quebec or "nova scotia\*" or "prince edward island\*" or "new brunswick" or newfoundland or yukon or "northwest territor\*" or NWT or nunavut).mp. 271214
- 50 exp Australia/ 169200
- 51 (Australia\* or queensland or "new south wales" or tasmania).mp. 231161
- 52 New Zealand/ 44020
- 53 ("New Zealand\*" or auckland or "hawkes bay" or gisborne or taranaki or wellington or canterbury or marlborough or nelson or westland or otago or southland).mp. 87096
- 54 exp united kingdom/ or exp england/ or exp scotland/ 389439
- 55 ("United kingdom" or UK or england or scotland or wales or ireland).mp. 541829

56 exp "scandinavian and nordic countries"/ or exp denmark/ or exp norway/ 220244  
 57 (Scandinavia\* or Norway or Norwegian\* or Sweden or swedish or denmark or finland or  
 Iceland or nordic\*).mp. 305949  
 58 exp united states/ or exp appalachian region/ or exp great lakes region/ or exp mid-  
 atlantic region/ or exp midwestern united states/ or exp new england/ or exp northwestern  
 united states/ or exp pacific states/ or exp southeastern united states/ or exp southwestern  
 united states/ 1458249  
 59 ("united states" or USA or alabama or alaska or arizona or arkansas or california or  
 colorado or connecticut or delaware or florida or georgia or hawaii or idaho or illinois or indiana  
 or iowa or kansas or kentucky or louisiana or maine or maryland or massachusetts or michigan  
 or minnesota or mississippi or missouri or montana or nebraska or nevada or "new hampshire"  
 or "new jersey" or "new mexico" or "new york" or "north carolina" or "north dakota" or ohio or  
 oklahoma or oregon or pennsylvania or "rhode island" or "south carolina" or "south dakota" or  
 tennessee or texas or utah or vermont or virginia or washington or "west virginia" or wisconsin  
 or wyoming).ti,ab. 818655  
 60 or/48-59 3170446  
 61 33 and 42 and 47 and 60 3180  
 62 limit 61 to (case reports or comment or editorial or letter or news) 67  
 63 61 not 62 3113  
 64 limit 63 to english language 3107  
 65 limit 64 to yr="2013 -Current" 1921

OVID Embase <1974 to 2023 May 09>

Date of search: May 10, 2023

1 rural population/ 55882  
 2 (((rural\* or remote\*) adj3 (living or live? or communit\* or population\* or reside\* or town\*  
 or village\* or setting\* or area\*)) or "small town\*" or countryside or "country side").mp.  
 189900  
 3 disabled person/ or mentally disabled person/ or exp physically disabled person/ 50446  
 4 ((learning or intellectual\* or physical\* or mobility or developmental\* or multiple) adj2  
 (disabl\* or disabilit\*).mp. 84266  
 5 ("hearing impair\*" or deaf\* or "hard of hearing" or "hearing los\*").mp. 156481  
 6 exp disability/ 189533  
 7 cerebral palsy/44182  
 8 chronic brain disease/3283  
 9 brain injury/ or brain damage/136046  
 10 ("brain damage\*" or "brain\* injur\*").mp. 239563  
 11 exp autism/ 93920  
 12 (autism or autistic\* or Asperger\*).mp. 103105  
 13 hearing impairment/ or deafblindness/ 70837  
 14 blindness/ 40281  
 15 (blind\* or "visual\* impair\*" or "vision los\*").mp. 657781

- 16 communication aid/ 2697
- 17 rehabilitation equipment/ or assistive scooter/ or blind mobility aid/ or dysphagia aid/ or exp "exoskeleton (rehabilitation)"/ or learning aid/ or sensory aid/ or exp walking aid/ or exp wheelchair/ 27927
- 18 hearing aid/ or exp cochlea prosthesis/ or digital hearing aid/ 31777
- 19 (wheelchair\* or crutch\* or cane? or walker\* or "mobility aid\*" or "hearing aid\*" or "cochlear implant\*" or "vision aid\*").mp. 84919
- 20 (dyslexi\* or dysgraphi\* or dyspraxi\* or dyscalculi\*).mp. 15725
- 21 (((people\* or person\* or individual\* or m?n or wom?n or population\*) adj3 (disabl\* or disabilit\*)) or handicapped).mp. 83284
- 22 exp vulnerable population/ 27285
- 23 exp lowest income group/ 35755
- 24 ((disadvantage\* or vulnerab\* or raciali\* or poor\* or "low\* income\*" or socioeconomic\* or socio-economic\* or discriminat\* or marginali\* or underserved or underrepresented) adj3 (population\* or group\* or communit\* or people\* or person\* or m?n or wom?n or male\* or female\* or adult\* or subpopulation or sub-population\* or patient\*)).mp. 373030
- 25 asian american/ or asian continental ancestry group/ or exp black person/ or british asian/ or exp hispanic/ or exp migrant/ or exp multiracial person/ 259407
- 26 exp forced migrant/ or exp refugee/ 17408
- 27 ethnic group/ 78785
- 28 (black? or african\* or afro\* or latin? or non-white or immigrant\* or emigrant\* or refugee\* or "asylum seek\*" or asian or non-caucasian or "racial minorit\*" or "ethnic minorit\*").mp. 796143
- 29 exp "sexual and gender minority"/ or exp lgbtqia+ people/ 39216
- 30 exp lgbt people/ or exp "transgender and gender nonbinary"/ 18788
- 31 (LGB\* or homosexual\* or gay? or lesbian\* or bisexual\* or transgender\* or transsexual\* or queer\* or "men who have sex with men" or MSM or "women who have sex with women" or WSW or "gender minorit\*" or "sex\* minorit\*").mp. 90794
- 32 social determinants of health/18805
- 33 Social determinants of health.mp. 23782
- 34 or/1-332896361
- 35 exp neoplasm/dt, rt, su, th [Drug Therapy, Radiotherapy, Surgery, Therapy] 1633414
- 36 exp neoplasm/ and (treatment\* or care or caring or management or therap\* or medicine\* or drug\* or surger\* or surgical).ab. 2910776
- 37 ((Cancer\* or Neoplasm\* or malignan\* or tumor\* or tumour\*) adj7 (treat\* or care or caring or management or therap\* or medicine\* or drug\* or surger\* or surgical)).mp. 2294042
- 38 exp antineoplastic agent/ 2752411
- 39 chemoradiotherapy/ 67989
- 40 cancer therapy/ or exp cancer chemotherapy/ or exp cancer radiotherapy/ 877684
- 41 (chemotherap\* or radiotherap\* or chemoradiotherap\*).mp. 1501706
- 42 oncological.mp. 67266

- 43 ((leukemia or sarcoma\* or lymphoma\* or myeloma\* or melanoma\* or carcinoma\*) adj7 (treat\* or care or caring or management or therap\* or medicine\* or drug\* or surger\* or surgical)).mp. 583805
- 44 or/35-43 5652766
- 45 health care access/ or unmet medical need/ 86049
- 46 ((health or healthcare or medicine\* or therap\* or treatment\* or program\* or service\*) adj4 (access\* or availab\* or convenien\* or delay\* or equal\* or equit\* or unequal\* or inequal\* or barrier\* or obstacle\*)).mp. 544992
- 47 access to care\*.mp. 24710
- 48 universal access\*.mp.3142
- 49 45 or 46 or 47 or 48 559989
- 50 exp Canada/ 214521
- 51 (Canad\* or "british columbia\*" or alberta\* or saskatchewan or manitoba\* or ontario or ontarian\* or quebec or "nova scotia\*" or "prince edward island\*" or "new brunswick" or newfoundland or yukon or "northwest territor\*" or NWT or nunavut).mp. 374596
- 52 australia and new zealand/ or exp australia/ or new zealand/ 262153
- 53 (Australia\* or queensland or "new south wales" or tasmania).mp. 319767
- 54 ("New Zealand\*" or auckland or "hawkes bay" or gisborne or taranaki or wellington or canterbury or marlborough or nelson or westland or otago or southland).mp. 135306
- 55 exp united kingdom/ or exp great britain/ 461654
- 56 ("United kingdom" or UK or england or scotland or wales or ireland).mp. 1005599
- 57 exp scandinavia/ or exp finland/ or exp norway/ 231455
- 58 (Scandinavia\* or Norway or Norwegian\* or Sweden or swedish or denmark or finland or Iceland or nordic\*).mp. 404821
- 59 exp United States/ 1366950
- 60 ("united states" or USA or alabama or alaska or arizona or arkansas or california or colorado or connecticut or delaware or florida or georgia or hawaii or idaho or illinois or indiana or iowa or kansas or kentucky or louisiana or maine or maryland or massachusetts or michigan or minnesota or mississippi or missouri or montana or nebraska or nevada or "new hampshire" or "new jersey" or "new mexico" or "new york" or "north carolina" or "north dakota" or ohio or oklahoma or oregon or pennsylvania or "rhode island" or "south carolina" or "south dakota" or tennessee or texas or utah or vermont or virginia or washington or "west virginia" or wisconsin or wyoming).ti,ab. 1148810
- 61 or/50-60 3932057
- 62 34 and 44 and 49 and 61 5896
- 63 limit 62 to (books or chapter or conference abstract or conference paper or "conference review" or editorial or letter or note) 2624
- 64 62 not 63 3272
- 65 limit 64 to (english language and yr="2013 -Current") 2149

OVID APA PsycInfo <1806 to May Week 2 2023>

Date of search: May 10, 2023

- 1 rural environments/ or rural health/ 22225
- 2 (((rural\* or remote\*) adj3 (living or live? or communit\* or population\* or reside\* or town\*  
or village\* or setting\* or area\*)) or "small town\*" or countryside or "country side").mp. 33326
- 3 disabilities/ or exp learning disabilities/ or exp multiple disabilities/ or exp reading  
disabilities/ 58274
- 4 hearing loss/ or exp deafness/ 16991
- 5 exp blindness/5954
- 6 ((learning or intellectual\* or physical\* or mobility or developmental\* or multiple) adj2  
(disabl\* or disabilit\*).mp. 71499
- 7 ("hearing impair\*" or deaf\* or "hard of hearing" or "hearing los\*").mp. 32883
- 8 cerebral palsy/ or brain disorders/ 11582
- 9 cerebral palsy.mp. 9190
- 10 ("brain damage\*" or "brain\* injur\*").mp. 57883
- 11 autism spectrum disorders/ 54044
- 12 (autism or autistic\* or Asperger\*).mp. 68935
- 13 (blind\* or "visual\* impair\*" or "vision los\*").mp. 73721
- 14 mobility aids/ 1287
- 15 exp hearing aids/ 5072
- 16 (wheelchair\* or crutch\* or cane? or walker\* or "mobility aid\*" or "hearing aid\*" or  
"cochlear implant\*" or "vision aid\*").mp. 14927
- 17 (dyslexi\* or dysgraphi\* or dyspraxi\* or dyscalculi\*).mp. 14152
- 18 (((people\* or person\* or individual\* or m?n or wom?n or population\*) adj3 (disabl\* or  
disabilit\*)) or handicapped).mp. 54653
- 19 ((disadvantage\* or vulnerab\* or raciali\* or poor\* or "low\* income\*" or socioeconomic\* or  
socio-economic\* or discriminat\* or marginali\* or underserved or underrepresented) adj3  
(population\* or group\* or communit\* or people\* or person\* or m?n or wom?n or male\* or female\*  
or adult\* or subpopulation or sub-population\* or patient\*).mp. 85743
- 20 asians/ or exp japanese cultural groups/ or exp southeast asian cultural groups/ 15594
- 21 blacks/59238
- 22 exp "latinos/latinas"/ 33417
- 23 exp immigration/ or refugees/33366
- 24 exp minority groups/ 20535
- 25 (black? or african\* or afro\* or latin? or non-white or immigrant\* or emigrant\* or refugee\*  
or "asylum seek\*" or asian or non-caucasian or "racial minorit\*" or "ethnic minorit\*").mp.  
245679
- 26 exp lgbtq/ or exp homosexuality/ or exp intersex/ 39686
- 27 (LGB\* or homosexual\* or gay? or lesbian\* or bisexual\* or transgender\* or transsexual\*  
or queer\* or "men who have sex with men" or MSM or "women who have sex with women" or  
WSW or "gender minorit\*" or "sex\* minorit\*").mp. 64447
- 28 social determinants of health.mp. 3254
- 29 or/1-28773778
- 30 exp neoplasms/ 60543
- 31 ((Cancer\* or Neoplasm\* or malignan\* or tumor\* or tumour\*) adj7 (treat\* or care or caring  
or management or therap\* or medicine\* or drug\* or surger\* or surgical)).mp. 36821

32 antineoplastic drugs/ 320  
 33 chemotherapy/ 3574  
 34 radiation therapy/ 1444  
 35 (chemotherap\* or radiotherap\* or chemoradiotherap\*).mp. 9298  
 36 oncological.mp. 1059  
 37 ((leukemia or sarcoma\* or lymphoma\* or myeloma\* or melanoma\* or carcinoma\*) adj7  
 (treat\* or care or caring or management or therap\* or medicine\* or drug\* or surger\* or  
 surgical)).mp. 1604  
 38 or/30-37 70927  
 39 health care access/ 2346  
 40 ((health or healthcare or medicine\* or therap\* or treatment\* or program\* or service\*) adj4  
 (access\* or availab\* or convenien\* or delay\* or equal\* or equit\* or unequal\* or inequal\* or  
 barrier\* or obstacle\*)).mp. 94251  
 41 access to care\*.mp. 4837  
 42 universal access\*.mp.504  
 43 39 or 40 or 41 or 42 96470  
 44 (Canad\* or "british columbia\*" or alberta\* or saskatchewan or manitoba\* or ontario or  
 ontarian\* or quebec or "nova scotia\*" or "prince edward island\*" or "new brunswick" or  
 newfoundland or yukon or "northwest territor\*" or NWT or nunavut).mp. 71854  
 45 (Australia\* or queensland or "new south wales" or tasmania).mp. 65574  
 46 ("New Zealand\*" or auckland or "hawkes bay" or gisborne or taranaki or wellington or  
 canterbury or marlborough or nelson or westland or otago or southland).mp. 18862  
 47 ("United kingdom" or UK or england or scotland or wales or ireland).mp. 104370  
 48 (Scandinavia\* or Norway or Norwegian\* or Sweden or swedish or denmark or finland or  
 Iceland or nordic\*).mp. 66484  
 49 ("united states" or USA or alabama or alaska or arizona or arkansas or california or  
 colorado or connecticut or delaware or florida or georgia or hawaii or idaho or illinois or indiana  
 or iowa or kansas or kentucky or louisiana or maine or maryland or massachusetts or michigan  
 or minnesota or mississippi or missouri or montana or nebraska or nevada or "new hampshire"  
 or "new jersey" or "new mexico" or "new york" or "north carolina" or "north dakota" or ohio or  
 oklahoma or oregon or pennsylvania or "rhode island" or "south carolina" or "south dakota" or  
 tennessee or texas or utah or vermont or virginia or washington or "west virginia" or wisconsin  
 or wyoming).ti,ab. 316505  
 50 44 or 45 or 46 or 47 or 48 or 49 603078  
 51 29 and 38 and 43 and 50 550  
 52 limit 51 to (english language and yr="2013 -Current") 310

CINAHL via EBSCOhost (1936 - Present)

Date of search: May 10, 2023

S1 (MH "Rural Population") 12,859  
 S2 (((rural\* or remote\*) N3 (living or live# or communit\* or population\* or reside\* or town\* or  
 village\* or setting\* or area\*)) or "small town\*" or countryside or "country side") 62,414

|     |                                                                                                                                                                                                                                                                                                                                         |         |        |
|-----|-----------------------------------------------------------------------------------------------------------------------------------------------------------------------------------------------------------------------------------------------------------------------------------------------------------------------------------------|---------|--------|
| S3  | (MH "Persons with Disabilities")                                                                                                                                                                                                                                                                                                        | 37,375  |        |
| S4  | (MH "Deafness") OR (MH "Deaf-Blind Disorders+")                                                                                                                                                                                                                                                                                         |         | 8,513  |
| S5  | (MH "Blindness+")                                                                                                                                                                                                                                                                                                                       | 6,753   |        |
| S6  | ((learning or intellectual* or physical* or mobility or developmental* or multiple) N2 (disabl* or disabilit*))                                                                                                                                                                                                                         | 46,363  |        |
| S7  | ("hearing impair*" or deaf* or "hard of hearing" or "hearing los*")                                                                                                                                                                                                                                                                     |         | 39,818 |
| S8  | (MH "Brain Damage, Chronic+")                                                                                                                                                                                                                                                                                                           | 14,829  |        |
| S9  | "cerebral palsy" OR ( ("brain damage*" or "brain* injur*") )                                                                                                                                                                                                                                                                            |         | 58,534 |
| S10 | (MH "Asperger Syndrome") OR (MH "Autistic Disorder")                                                                                                                                                                                                                                                                                    |         | 29,322 |
| S11 | (autism or autistic* or Asperger*)                                                                                                                                                                                                                                                                                                      | 37,463  |        |
| S12 | (blind* or "visual* impair*" or "vision los*")                                                                                                                                                                                                                                                                                          | 136,070 |        |
| S13 | (MH "Ambulation Aids+") OR (MH "Communication Aids for Persons with Disabilities+") OR (MH "Cochlear Implant+") OR (MH "Hearing Aids+") OR (MH "Wheelchairs+")                                                                                                                                                                          | 30,773  |        |
| S14 | (wheelchair* or crutch* or cane# or walker* or "mobility aid*" or "hearing aid*" or "cochlear implant*" or "vision aid*")                                                                                                                                                                                                               | 58,874  |        |
| S15 | (dyslexi* or dysgraphi* or dyspraxi* or dyscalculi*)                                                                                                                                                                                                                                                                                    | 3,697   |        |
| S16 | ((people* or person* or individual* or m#n or wom#n or population*) N3 (disabl* or disabilit*)) or handicapped)                                                                                                                                                                                                                         | 71,735  |        |
| S17 | (MH "Special Populations")                                                                                                                                                                                                                                                                                                              | 8,235   |        |
| S18 | ((disadvantage* or vulnerab* or raciali* or poor* or "low* income*" or socioeconomic* or socio-economic* or discriminat* or marginali* or underserved or underrepresented) N3 (population* or group* or communit* or people* or person* or m#n or wom#n or male* or female* or adult* or subpopulation or sub-population* or patient*)) | 107,140 |        |
| S19 | (MH "Black Persons+") OR (MH "Asians+") OR (MH "Hispanic Americans+")                                                                                                                                                                                                                                                                   | 108,996 |        |
| S20 | (MH "Immigrants+") OR (MH "Refugees+")                                                                                                                                                                                                                                                                                                  | 25,925  |        |
| S21 | (MH "Emigration and Immigration") OR (MH "Transients and Migrants")                                                                                                                                                                                                                                                                     |         | 12,930 |
| S22 | (black# or african* or afro* or latin? or non-white or immigrant* or emigrant* or refugee* or "asylum seek*" or asian or non-caucasian or "racial minorit*" or "ethnic minorit*")                                                                                                                                                       | 214,424 |        |
| S23 | (MH "Sexual and Gender Minorities+") OR (MH "Gender-Nonconforming Persons+") OR (MH "LGBTQ+ Persons+") OR (MH "Gay Persons+") OR (MH "Transgender Persons+")                                                                                                                                                                            | 19,275  |        |
| S24 | (MH "Homosexuality") OR (MH "Bisexuality") OR (MH "Asexuality") OR (MH "Questioning Persons")                                                                                                                                                                                                                                           | 8,064   |        |
| S25 | (LGB* or homosexual* or gay# or lesbian* or bisexual* or transgender* or transsexual* or queer* or "men who have sex with men" or MSM or "women who have sex with women" or WSW or "gender minorit*" or "sex* minorit*")                                                                                                                | 39,736  |        |
| S26 | (MH "Social Determinants of Health")                                                                                                                                                                                                                                                                                                    | 10,622  |        |
| S27 | "Social determinants of health"                                                                                                                                                                                                                                                                                                         | 13,345  |        |
| S28 | S1 OR S2 OR S3 OR S4 OR S5 OR S6 OR S7 OR S8 OR S9 OR S10 OR S11 OR S12 OR S13 OR S14 OR S15 OR S16 OR S17 OR S18 OR S19 OR S20 OR S21 OR S22 OR S23 OR S24 OR S25 OR S26 OR S27                                                                                                                                                        | 818,849 |        |



S29 (MH "Neoplasms+/DT/RT/SU/TH") OR (MH "Neoplasms by Histologic Type+/DT/RA/SU/TH") OR (MH "Neoplasms by Site+/DT/RA/SU/TH") 317,436

S30 ((Cancer\* or Neoplasm\* or malignan\* or tumor\* or tumour\*) N7 (treat\* or care or caring or management or therap\* or medicine\* or drug\* or surger\* or surgical)) 378,695

S31 (MH "Antineoplastic Agents+") 137,556

S32 (MH "Chemotherapy, Cancer+") OR (MH "Chemoradiotherapy+") 38,058

S33 (MH "Radiotherapy") 20,317

S34 (chemotherap\* or radiotherap\* or chemoradiotherap\*) 161,602

S35 oncological 6,814

S36 ((leukemia or sarcoma\* or lymphoma\* or myeloma\* or melanoma\* or carcinoma\*) N7 (treat\* or care or caring or management or therap\* or medicine\* or drug\* or surger\* or surgical)) 104,757

S37 S29 OR S30 OR S31 OR S32 OR S33 OR S34 OR S35 OR S36 539,824

S38 (MH "Health Services Accessibility+") OR (MH "Healthcare Disparities") 116,888

S39 ((health or healthcare or medicine\* or therap\* or treatment\* or program\* or service\*) N4 (access\* or availab\* or convenien\* or delay\* or equal\* or equit\* or unequal\* or inequal\* or barrier\* or obstacle\*)) 232,767

S40 "access to care\*" 7,603

S41 "universal access\*" 1,127

S42 S38 OR S39 OR S40 OR S41 246,557

S43 (MH "Canada+") 111,484

S44 (Canad\* or "british columbia\*" or alberta\* or saskatchewan or manitoba\* or ontario or ontarian\* or quebec or "nova scotia\*" or "prince edward island\*" or "new brunswick" or newfoundland or yukon or "northwest territor\*" or NWT or nunavut) 155,045

S45 (MH "Australia+") 127,808

S46 (Australia\* or queensland or "new south wales" or tasmania) 156,740

S47 (MH "New Zealand") 31,679

S48 ("New Zealand\*" or auckland or "hawkes bay" or gisborne or taranaki or wellington or canterbury or marlborough or nelson or westland or otago or southland) 67,580

S49 (MH "United Kingdom+") OR (MH "Great Britain+") 326,966

S50 ("United kingdom" or UK or england or scotland or wales or ireland) 406,209

S51 (MH "Scandinavia+") 81,110

S52 (Scandinavia\* or Norway or Norwegian\* or Sweden\* or swedish or denmark or finland or Iceland or nordic\*) 104,370

S53 (MH "United States+") OR (MH "United States by Individual State+") OR (MH "United States by Region+") 746,688

S54 TI ( ("united states" or USA or alabama or alaska or arizona or arkansas or california or colorado or connecticut or delaware or florida or georgia or hawaii or idaho or illinois or indiana or iowa or kansas or kentucky or louisiana or maine or maryland or massachusetts or michigan or minnesota or mississippi or missouri or montana or nebraska or nevada or "new hampshire" or "new jersey" or "new mexico" or "new york" or "north carolina" or "north dakota" or ohio or oklahoma or oregon or pennsylvania or "rhode island" or "south carolina" or "south dakota" or

tennessee or texas or utah or vermont or virginia or washington or "west virginia" or wisconsin or wyoming) ) OR AB ( ("united states" or USA or alabama or alaska or arizona or arkansas or california or colorado or connecticut or delaware or florida or georgia or hawaii or idaho or illinois or indiana or iowa or kansas or kentucky or louisiana or maine or maryland or massachusetts or michigan or minnesota or mississippi or missouri or montana or nebraska or nevada or "new hampshire" or "new jersey" or "new mexico" or "new york" or "north carolina" or "north dakota" or ohio or oklahoma or oregon or pennsylvania or "rhode island" or "south carolina" or "south dakota" or tennessee or texas or utah or vermont or virginia or washington or "west virginia" or wisconsin or wyoming) ) 452,525

S55 S43 OR S44 OR S45 OR S46 OR S47 OR S48 OR S49 OR S50 OR S51 OR S52 OR S53 OR S54 1,778,336

S56 S28 AND S37 AND S42 AND S55 1,879

S57 Limit S56 to English language, publication date 2013-present, scholarly (peer-reviewed) journals 1,194

Scopus (1976 - Present)

Date of search: May 10, 2023

(( TITLE-ABS-KEY (( canad\* OR "british columbia\*" OR alberta\* OR saskatchewan OR manitoba\* OR ontario OR ontarian\* OR quebec OR "nova scotia\*" OR "prince edward island\*" OR "new brunswick" OR newfoundland OR yukon OR "northwest territor\*" OR nwt OR nunavut )) OR TITLE-ABS-KEY (( australia\* OR queensland OR "new south wales" OR tasmania )) OR TITLE-ABS-KEY (( "New Zealand\*" OR auckland OR "hawkes bay" OR gisborne OR taranaki OR wellington OR canterbury OR marlborough OR nelson OR westland OR otago OR southland )) OR TITLE-ABS-KEY (( "United kingdom" OR uk OR england OR scotland OR wales OR ireland )) OR TITLE-ABS-KEY (( scandinavia\* OR norway OR norwegian\* OR sweden OR swedish OR denmark OR finland OR iceland OR nordic\* )) OR TITLE-ABS-KEY (( "united states" OR usa OR alabama OR alaska OR arizona OR arkansas OR california OR colorado OR connecticut OR delaware OR florida OR georgia OR hawaii OR idaho OR illinois OR indiana OR iowa OR kansas OR kentucky OR louisiana OR maine OR maryland OR massachusetts OR michigan OR minnesota OR mississippi OR missouri OR montana OR nebraska OR nevada OR "new hampshire" OR "new jersey" OR "new mexico" OR "new york" OR "north carolina" OR "north dakota" OR ohio OR oklahoma OR oregon OR pennsylvania OR "rhode island" OR "south carolina" OR "south dakota" OR tennessee OR texas OR utah OR vermont OR virginia OR washington OR "west virginia" OR wisconsin OR wyoming )))) AND (( TITLE-ABS-KEY ((( health OR healthcare OR medicine\* OR therap\* OR treatment\* OR program\* OR service\*) W/4 (access\* OR availab\* OR convenien\* OR delay\* OR equal\* OR equit\* OR unequal\* OR inequal\* OR barrier\* OR obstacle\* )))) OR TITLE-ABS-KEY ("access to care\*" OR "universal access\*")))) AND (( TITLE-ABS-KEY ((( cancer\* OR neoplasm\* OR malignan\* OR tumor\* OR tumour\* ) W/7 ( treat\* OR care OR caring OR management OR therap\* OR medicine\* OR drug\* OR surger\* OR surgical )))) OR TITLE-ABS-KEY (( chemotherap\* OR radiotherap\* OR

chemoradiotherap\* ) ) OR TITLE-ABS-KEY ( oncological ) OR TITLE-ABS-KEY ( ( ( leukemia OR sarcoma\* OR lymphoma\* OR myeloma\* OR melanoma\* OR carcinoma\* ) W/7 ( treat\* OR care OR caring OR management OR therap\* OR medicine\* OR drug\* OR surger\* OR surgical ) ) ) ) AND ( ( TITLE-ABS-KEY ( ( ( rural\* OR remote\* ) W/3 ( living OR live? OR communit\* OR population\* OR reside\* OR town\* OR village\* OR setting\* OR area\* ) ) OR "small town\*" OR countryside OR "country side" ) ) OR ( TITLE-ABS-KEY ( ( learning OR intellectual\* OR physical\* OR mobility OR developmental\* OR multiple ) W/2 ( disabl\* OR disabilit\* ) ) ) OR ( ( TITLE-ABS-KEY ( ( "hearing impair\*" OR deaf\* OR "hard of hearing" OR "hearing los\*" ) ) OR TITLE-ABS-KEY ( "cerebral palsy" OR "brain damage\*" OR "brain\* injur\*" ) OR TITLE-ABS-KEY ( ( autism OR autistic\* OR asperger\* ) ) OR TITLE-ABS-KEY ( ( blind\* OR "visual\* impair\*" OR "vision los\*" ) ) OR TITLE-ABS-KEY ( ( wheelchair\* OR crutch\* OR cane? OR walker\* OR "mobility aid\*" OR "hearing aid\*" OR "cochlear implant\*" OR "vision aid\*" ) ) OR TITLE-ABS-KEY ( ( dyslexi\* OR dysgraphi\* OR dyspraxi\* OR dyscalculi\* ) ) ) ) OR ( ( TITLE-ABS-KEY ( ( ( people\* OR person\* OR individual\* OR m?n OR wom?n OR population\* ) W/3 ( disabl\* OR disabilit\* ) ) OR handicapped ) ) OR TITLE-ABS-KEY ( ( ( disadvantage\* OR vulnerab\* OR raciali\* OR poor\* OR "low\* income\*" OR socioeconomic\* OR socio-economic\* OR discriminat\* OR marginali\* OR underserved OR underrepresented ) W/3 ( population\* OR group\* OR communit\* OR people\* OR person\* OR m?n OR wom?n OR male\* OR female\* OR adult\* OR subpopulation OR sub-population\* OR patient\* ) ) ) OR TITLE-ABS-KEY ( ( black? OR african\* OR afro\* OR latin? OR non-white OR immigrant\* OR emigrant\* OR refugee\* OR "asylum seek\*" OR asian OR non-caucasian OR "racial minorit\*" OR "ethnic minorit\*" ) ) OR TITLE-ABS-KEY ( ( lgb\* OR homosexual\* OR gay? OR lesbian\* OR bisexual\* OR transgender\* OR transsexual\* OR queer\* OR "men who have sex with men" OR msm OR "women who have sex with women" OR wsw OR "gender minorit\*" OR "sex\* minorit\*" ) ) OR TITLE-ABS-KEY ( "Social determinants of health" ) ) ) ) AND ( LIMIT-TO ( PUBYEAR , 2023 ) OR LIMIT-TO ( PUBYEAR , 2022 ) OR LIMIT-TO ( PUBYEAR , 2021 ) OR LIMIT-TO ( PUBYEAR , 2020 ) OR LIMIT-TO ( PUBYEAR , 2019 ) OR LIMIT-TO ( PUBYEAR , 2018 ) OR LIMIT-TO ( PUBYEAR , 2017 ) OR LIMIT-TO ( PUBYEAR , 2016 ) OR LIMIT-TO ( PUBYEAR , 2015 ) OR LIMIT-TO ( PUBYEAR , 2014 ) OR LIMIT-TO ( PUBYEAR , 2013 ) ) ) AND ( LIMIT-TO ( DOCTYPE , "ar" ) OR LIMIT-TO ( DOCTYPE , "re" ) ) ) AND ( LIMIT-TO ( LANGUAGE , "English" ) ) Results 1755

Cochrane Library via Wiley (1993 - Present)

Date of search: May 10, 2023

- #1 (((rural\* or remote\*) NEAR/3 (living or live? or communit\* or population\* or reside\* or town\* or village\* or setting\* or area\*)) or (small NEXT town\*) or countryside or "country side"):ti,ab,kw 8118
- #2 ((learning or intellectual\* or physical\* or mobility or developmental\* or multiple) NEAR/2 (disabl\* or disabilit\*)):ti,ab,kw 6394
- #3 ((hearing NEXT impair\*) or deaf\* or "hard of hearing" or "hearing loss"):ti,ab,kw 5105
- #4 ("cerebral palsy" or (brain NEXT (damag\* or injur\*)):ti,ab,kw 13299

- #5 (autism or autistic\* or Asperger\*):ti,ab,kw 4978
- #6 (blind\* or (visual\* NEXT impair\*) or "vision loss"):ti,ab,kw 442067
- #7 (wheelchair\* or crutch\* or cane? or walker\* or (mobility NEXT aid\*) or (hearing NEXT aid\*) or (cochlear NEXT implant\*) or (vision NEXT aid\*)):ti,ab,kw 4180
- #8 (dyslexi\* or dysgraphi\* or dyspraxi\* or dyscalculi\*):ti,ab,kw 644
- #9 (((people\* or person\* or individual\* or m?n or wom?n or population\*) NEAR/3 (disabl\* or disabilit\*) or handicapped):ti,ab,kw 3848
- #10 ((disadvantage\* or vulnerab\* or raciali\* or poor\* or "low\* income\*" or socioeconomic\* or socio-economic\* or discriminat\* or marginali\* or underserved or underrepresented) NEAR/3 (population\* or group\* or communit\* or people\* or person\* or m?n or wom?n or male\* or female\* or adult\* or subpopulation or sub-population\* or patient\*)):ti,ab,kw 21100
- #11 (black? or african\* or afro\* or latin? or non-white or immigrant\* or emigrant\* or refugee\* or (asylum NEXT seek\*) or asian or non-caucasian or ((racial or ethnic) NEXT minorit\*)):ti,ab,kw 39451
- #12 (LGB\* or homosexual\* or gay? or lesbian\* or bisexual\* or transgender\* or transsexual\* or queer\* or "men who have sex with men" or MSM or "women who have sex with women" or WSW or ((gender or sex\*) NEXT minorit\*)):ti,ab,kw 3132
- #13 Social determinants of health:ti,ab,kw 460
- #14 {or #1-#13} 522785
- #15 ((Cancer\* or Neoplasm\* or malignan\* or tumor\* or tumour\*) NEAR/7 (treat\* or care or caring or management or therap\* or medicine\* or drug\* or surger\* or surgical)):ti,ab,kw 148512
- #16 (chemotherap\* or radiotherap\* or chemoradiotherap\*):ti,ab,kw 113822
- #17 oncological:ti,ab,kw 2711
- #18 ((leukemia or sarcoma\* or lymphoma\* or myeloma\* or melanoma\* or carcinoma\*) NEAR/7 (treat\* or care or caring or management or therap\* or medicine\* or drug\* or surger\* or surgical)):ti,ab,kw 48488
- #19 {or #15-#18} 203924
- #20 ((health or healthcare or medicine\* or therap\* or treatment\* or program\* or service\*) NEAR/4 (access\* or availab\* or convenien\* or delay\* or equal\* or equit\* or unequal\* or inequal\* or barrier\* or obstacle\*)):ti,ab,kw 36275
- #21 access to care:ti,ab,kw 780
- #22 universal access:ti,ab,kw 79
- #23 #20 or #21 or #22 36711
- #24 (Canad\* or "british columbia" or alberta\* or saskatchewan or manitoba\* or ontario or ontarian\* or quebec or "nova scotia" or "prince edward island" or "new brunswick" or newfoundland or yukon or "northwest territory" or NWT or nunavut):ti,ab,kw 25065
- #25 (Australia\* or queensland or "new south wales" or tasmania):ti,ab,kw 21523
- #26 ("New Zealand" or auckland or "hawkes bay" or gisborne or taranaki or wellington or canterbury or marlborough or nelson or westland or otago or southland):ti,ab,kw 9268
- #27 ("United kingdom" or UK or england or scotland or wales or ireland):ti,ab,kw 38048
- #28 (Scandinavia\* or Norway or Norwegian\* or Sweden or swedish or denmark or finland or Iceland or nordic\*):ti,ab,kw 24767

#29 ("united states" or USA or alabama or alaska or arizona or arkansas or california or colorado or connecticut or delaware or florida or georgia or hawaii or idaho or illinois or indiana or iowa or kansas or kentucky or louisiana or maine or maryland or massachusetts or michigan or minnesota or mississippi or missouri or montana or nebraska or nevada or "new hampshire" or "new jersey" or "new mexico" or "new york" or "north carolina" or "north dakota" or ohio or oklahoma or oregon or pennsylvania or "rhode island" or "south carolina" or "south dakota" or tennessee or texas or utah or vermont or virginia or washington or "west virginia" or wisconsin or wyoming):ti,ab,kw 90912

#30 #24 or #25 or #26 or #27 or #28 or #29 189130

#31 #14 and #19 and #23 and #30 220
